# Supplementary material for: Synthesis of low-symmetry 2D Ge(1−x)SnxSe2 alloy flakes with anisotropic optical response and birefringence
Source: Royal Society of Chemistry journal article supplement (doi:10.1039/c9nr07820g), 2019-01-01
Supplement: c9nr07820g1.pdf [file c9nr07820g1.pdf]

## Supporting Information

### Synthesis of low-symmetry 2D $\text{Ge}_{(1-x)}\text{Sn}_x\text{Se}_2$ alloy flakes with anisotropic optical response and birefringence

Yijun Liu,<sup>a</sup> Minghui Wu,<sup>b</sup> Zhaoyang Sun,<sup>c</sup> Shengxue Yang,<sup>\*a</sup> Chunguang Hu,<sup>c</sup> Li Huang,<sup>b</sup> Wanfu Shen,<sup>c</sup> Bin Wei,<sup>d</sup> Zhongchang Wang,<sup>d</sup> Shiqi Yang,<sup>e</sup> Yu Ye,<sup>e</sup> Yan Li<sup>f</sup> and Chengbao Jiang<sup>\*a</sup>

<sup>a</sup>School of Materials Science and Engineering, Beihang University, Beijing 100191, P. R. China.

<sup>b</sup>Department of Physics, Southern University of Science and Technology, Shenzhen 518005, P. R. China

<sup>c</sup>State Key Laboratory of Precision Measuring Technology and Instruments, Tianjin University, Weijin Road, CN-300072 Tianjin, P. R. China

<sup>d</sup>Department of Quantum and Energy Materials, International Iberian Nanotechnology Laboratory (INL), Av. Mestre José Veiga s/n, Braga 4715-330, Portugal

<sup>e</sup>State Key Laboratory for Artificial Microstructure & Mesoscopic Physics, Nano-optoelectronics Frontier Center of the Ministry of Education, School of Physics, Peking University, Beijing 100871, China

<sup>f</sup>State Key Laboratory for Mechanical Behavior of Materials, Xi'an Jiaotong University, Xi'an, Shanxi, 710049, China

\*Corresponding Author: Email: [sxyang@buaa.edu.cn](mailto:sxyang@buaa.edu.cn), [jiangcb@buaa.edu.cn](mailto:jiangcb@buaa.edu.cn)

## Supporting Figures and Tables

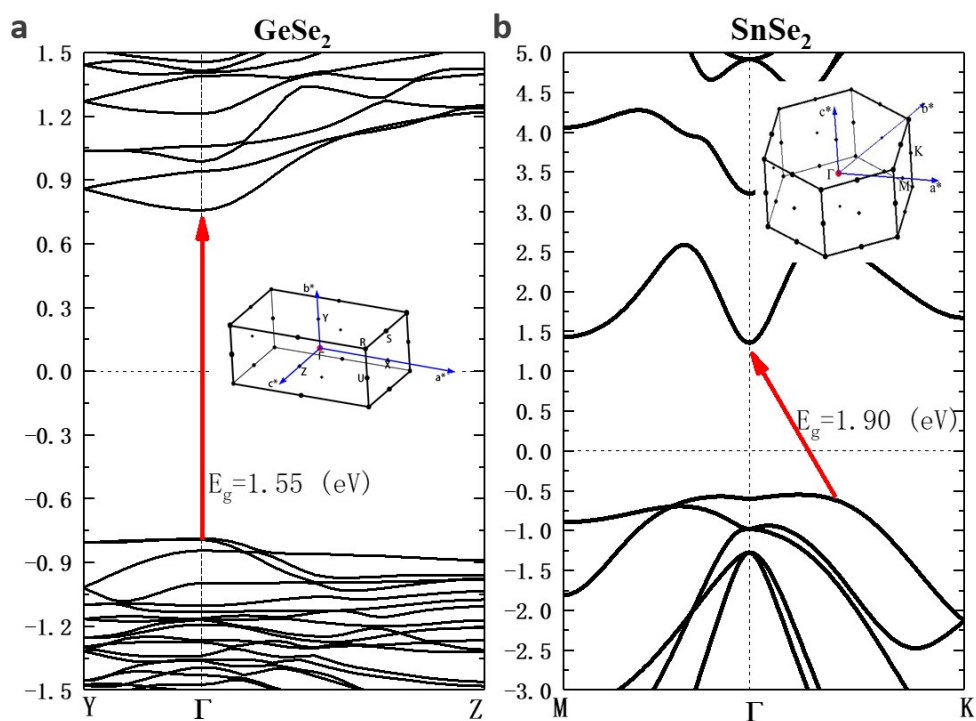

**Fig. S1** Band structure and the first Brillouin zone of bulk  $\text{GeSe}_2$  (a) and bulk  $\text{SnSe}_2$  (b).

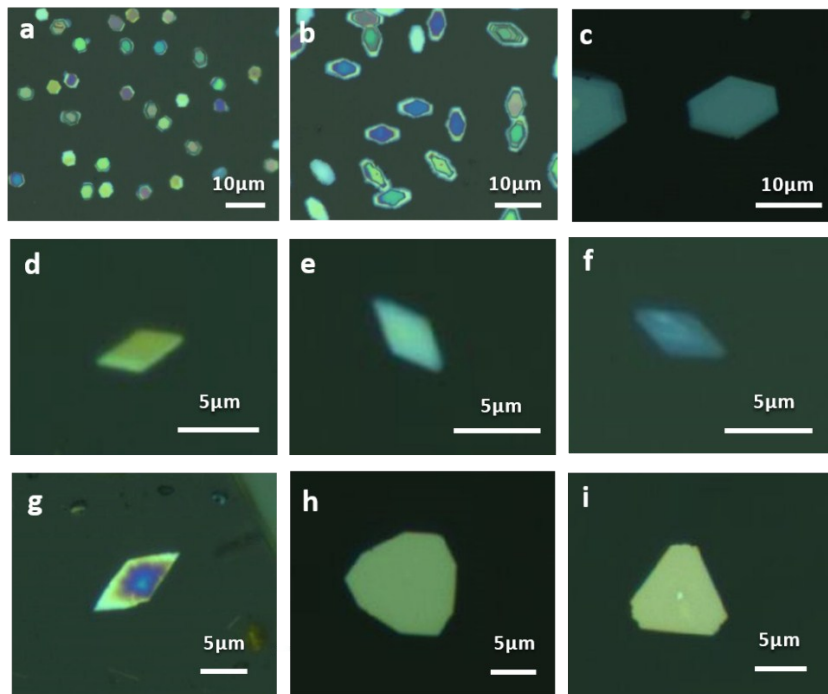

**Fig. S2** (a-i) OM images of the  $\text{Ge}_{(1-x)}\text{Sn}_x\text{Se}_2$  alloy flakes on the mica substrates under different growth conditions corresponding to Table S1.

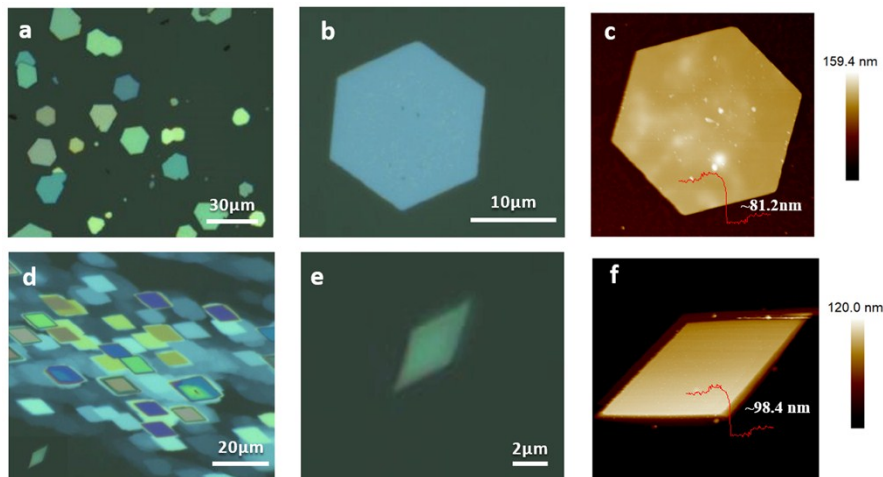

**Fig. S3** (a-f) OM and AFM images of as-grown  $\text{SnSe}_2$  (a-c) and  $\text{GeSe}_2$  (d-f) flakes on the mica substrates.

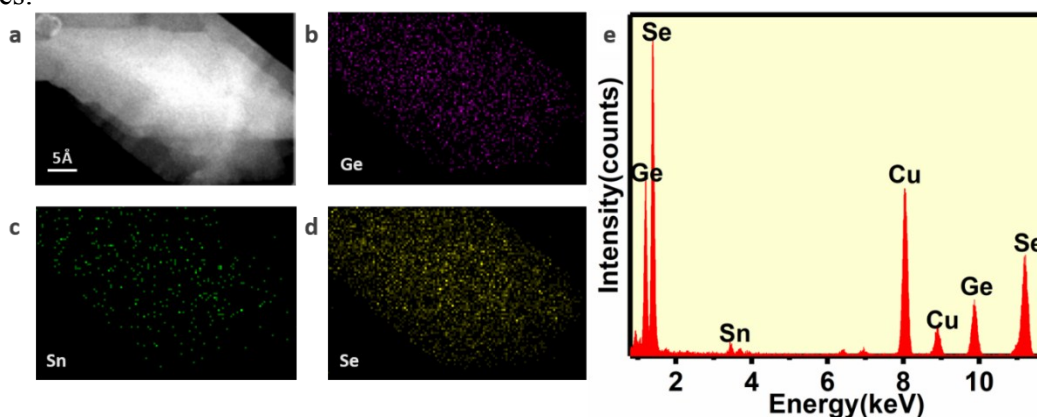

**Fig. S4** EDS images of the  $\text{Ge}_{0.86}\text{Sn}_{0.14}\text{Se}_2$  alloy flakes, which were synthesized at 500 °C for 10 min with the mixed gas ( $\text{Ar}/\text{H}_2$ ) flow rate of 16 sccm, then cooling down to the room temperature naturally. (a) TEM image of a single as-grown alloy flake. (b-d) EDS mapping of Ge, Sn, and Se elements, respectively. (e) EDS spectrum of the as-grown flake.

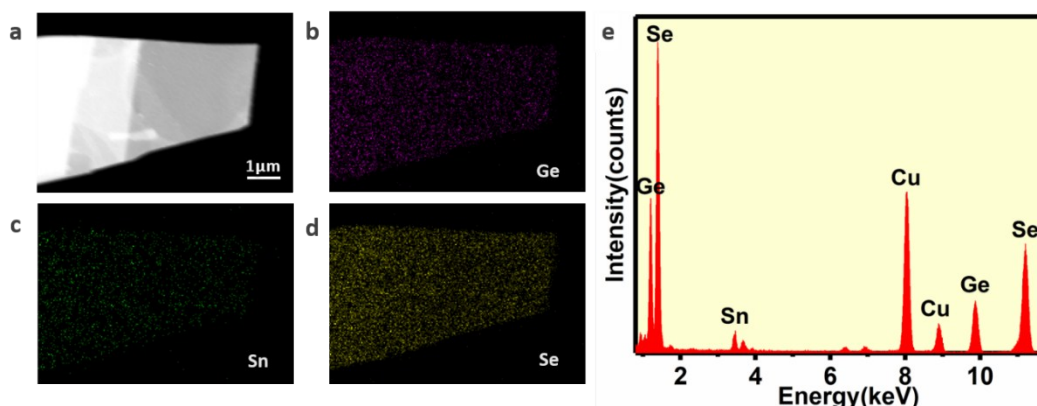

**Fig. S5** EDS images of the  $\text{Ge}_{0.74}\text{Sn}_{0.26}\text{Se}_2$  alloy flakes, which were synthesized at 550 °C for 10 min with the mixed gas ( $\text{Ar}/\text{H}_2$ ) flow rate of 20 sccm, then cooling down to the room temperature naturally. (a) TEM image of a single as-grown alloy flake. (b-d) EDS mapping of Ge, Sn, and Se elements, respectively. (e) EDS spectrum of the as-grown flake.

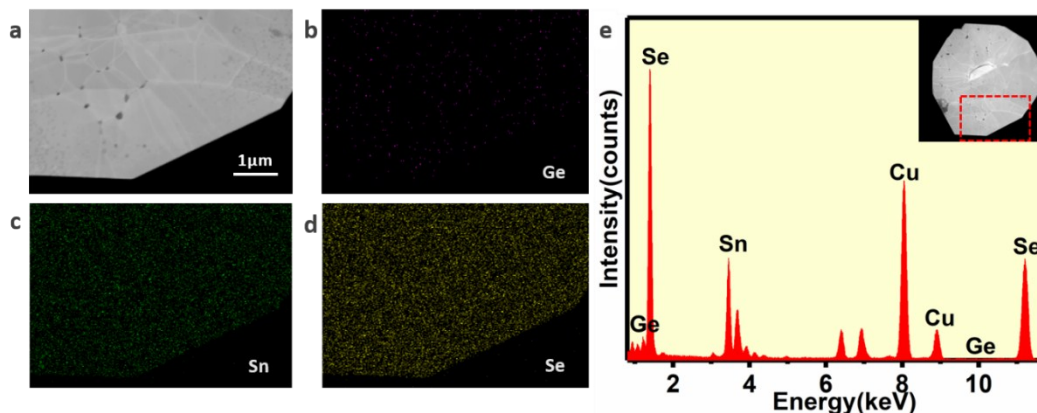

**Fig. S6** EDS images of the  $\text{Ge}_{0.03}\text{Sn}_{0.97}\text{Se}_2$  alloy flakes, which were synthesized at 550 °C for 10 min with the mixed gas ( $\text{Ar}/\text{H}_2$ ) flow rate of 16 sccm, then cooling down to the room temperature naturally. (a) TEM image of a single as-grown alloy flake. (b-d) EDS mapping of Ge, Sn, and Se elements, respectively. (e) EDS spectrum of the as-grown flake.

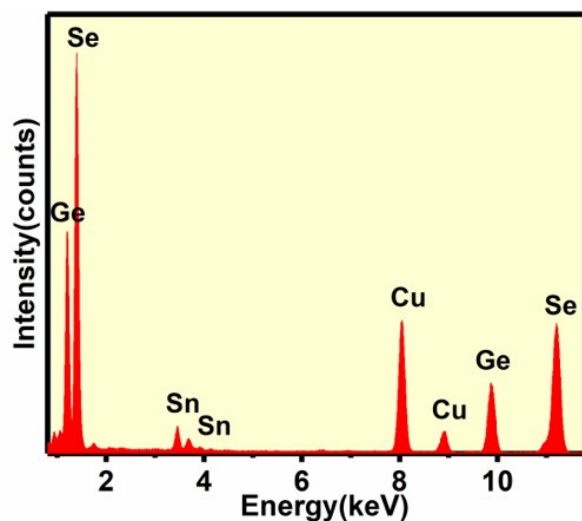

**Fig. S7** EDS spectrum of the  $\text{Ge}_{0.88}\text{Sn}_{0.12}\text{Se}_2$  flake.

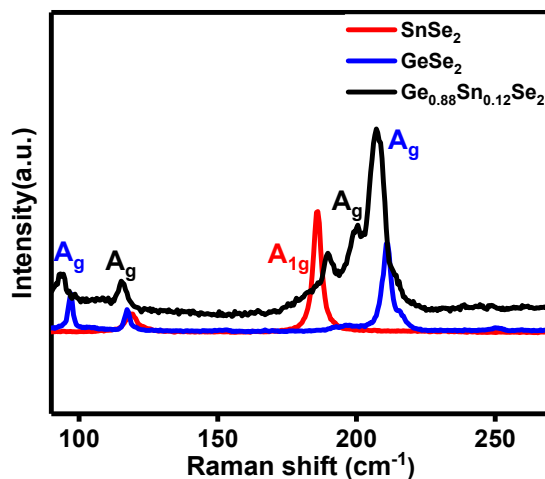

**Fig. S8** Raman spectra of as-grown  $\text{SnSe}_2$  (red line),  $\text{GeSe}_2$  (blue line), and  $\text{Ge}_{0.88}\text{Sn}_{0.12}\text{Se}_2$  (black line) flakes on the mica substrates.

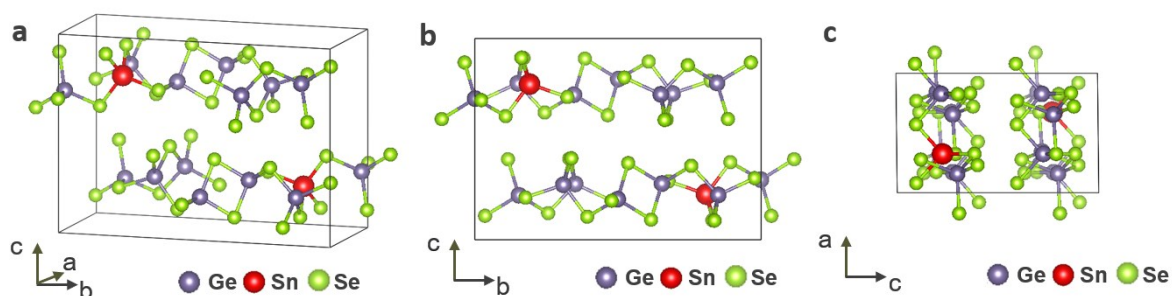

**Fig. S9** (a-c) Schematic diagrams of the  $\text{Ge}_{0.88}\text{Sn}_{0.12}\text{Se}_2$  crystal structure viewed from different directions.

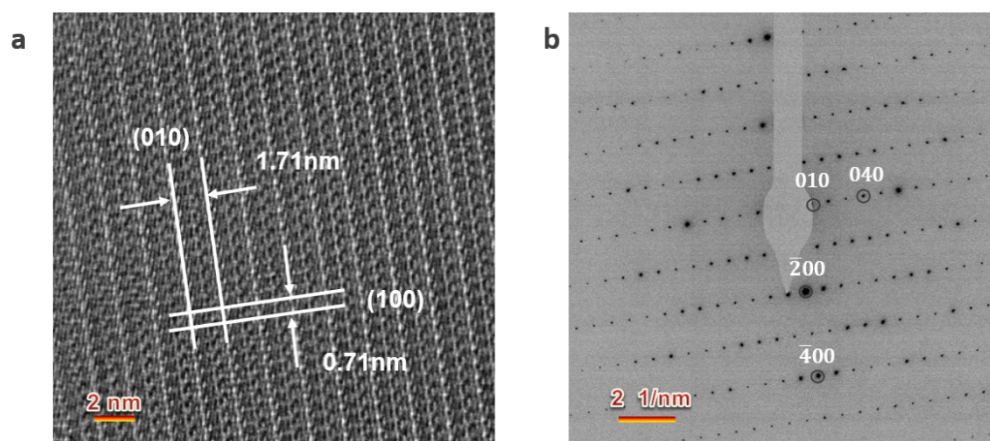

**Fig. S10** (a, b) HRTEM (a) and SAED (b) images of the  $\text{Ge}_{0.88}\text{Sn}_{0.12}\text{Se}_2$  flake.

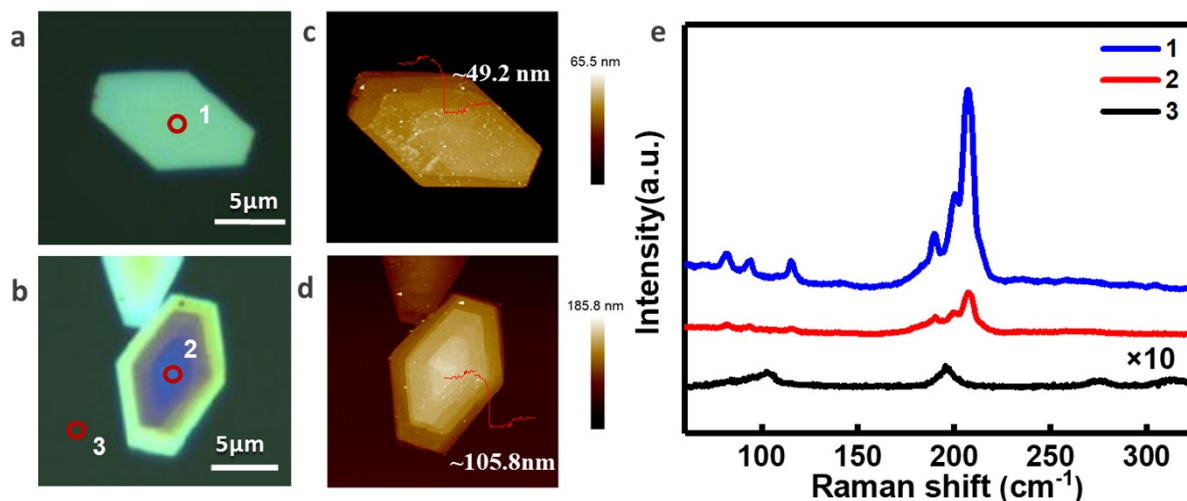

**Fig. S11** (a-d) OM and AFM images of the 49.2 nm (a, c) and 105.8 nm (b, d) thick  $\text{Ge}_{0.88}\text{Sn}_{0.12}\text{Se}_2$  flakes, respectively. (e) The corresponding Raman spectra of the  $\text{Ge}_{0.88}\text{Sn}_{0.12}\text{Se}_2$  flakes with different thicknesses and the blank mica substrate. The spectrum of Area 3 was magnified ten times.

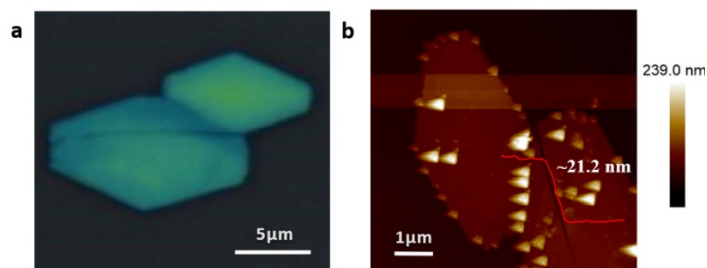

**Fig. S12** (a) OM and (b) AFM images of a  $\text{Ge}_{0.88}\text{Sn}_{0.12}\text{Se}_2$  flake used for the ADRDM characterization.

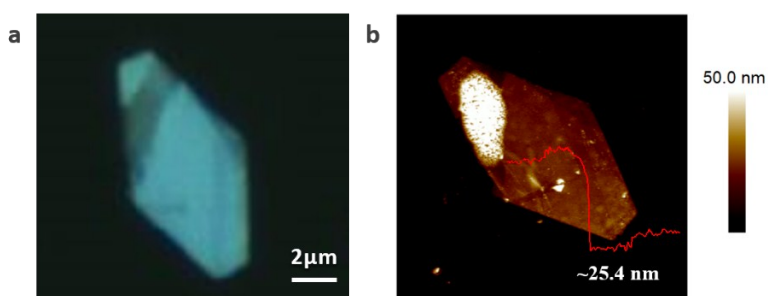

**Fig. S13** (a) OM and (b) AFM images of a  $\text{Ge}_{0.88}\text{Sn}_{0.12}\text{Se}_2$  flake on a quartz substrate.

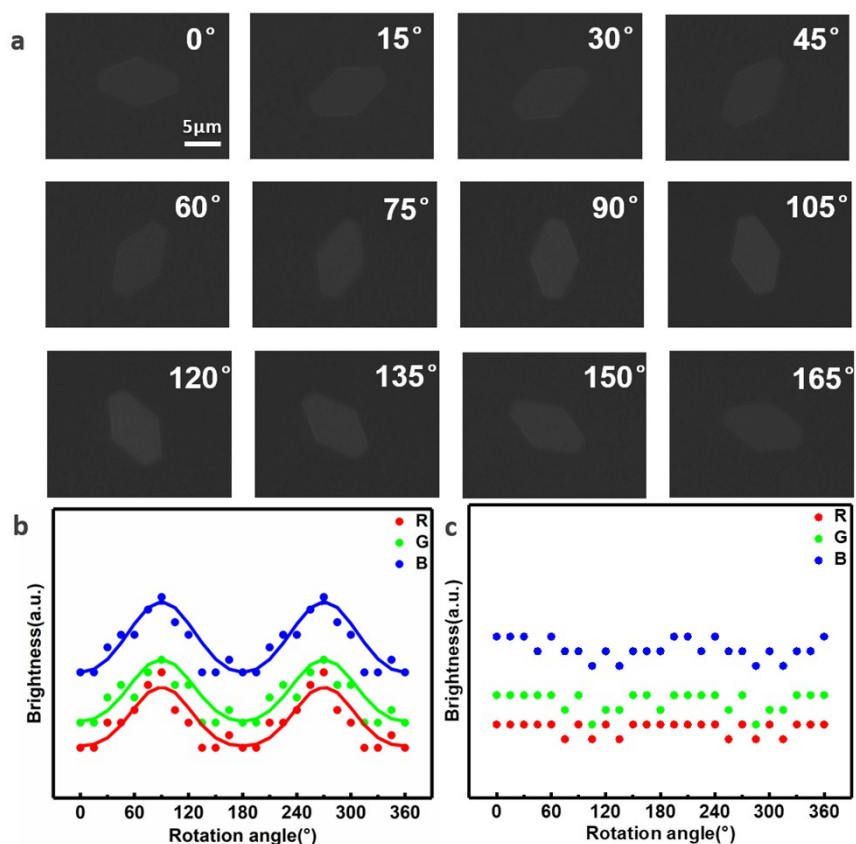

**Fig. S14** (a) POM images of a  $\text{Ge}_{0.88}\text{Sn}_{0.12}\text{Se}_2$  flake at different rotation angles ( $0 - 165^\circ$ ). (b, c) RGB optical brightness intensities of the reflected light from the  $\text{Ge}_{0.88}\text{Sn}_{0.12}\text{Se}_2$  flake (b) and the blank 285 nm  $\text{SiO}_2/\text{Si}$  substrate (c), respectively.

**Table S1.** Different growth conditions of  $\text{Ge}_{(1-x)}\text{Sn}_x\text{Se}_2$  alloy flakes.

| No. | Holding temperature/ $^{\circ}\text{C}$ | Holding time/min | Gas flow rate/sccm | Cooling method  |
|-----|-----------------------------------------|------------------|--------------------|-----------------|
| 1-a | 515                                     | 7                | 16                 | rapid cooling   |
| 2-b | 515                                     | 10               | 16                 | rapid cooling   |
| 3-c | 515                                     | 10               | 16                 | natural cooling |
| 4-d | 500                                     | 30               | 12                 | natural cooling |
| 5-e | 500                                     | 30               | 16                 | natural cooling |
| 6-f | 500                                     | 30               | 20                 | natural cooling |
| 7-g | 500                                     | 10               | 16                 | natural cooling |
| 8-h | 530                                     | 10               | 16                 | natural cooling |
| 9-i | 550                                     | 10               | 16                 | natural cooling |
